# Supplementary material for: Safety and efficacy of toll-like receptor agonists as therapeutic agents and vaccine adjuvants for infectious diseases in animals: a systematic review
Source: Front Vet Sci. 2024 Sep 17;11:1428713. doi: 10.3389/fvets.2024.1428713 (PMC11442433; doi:10.3389/fvets.2024.1428713)
Supplement: Supplementary file 1 [file Table_1.xlsx]

## Sheet: Sheet1
Sequence generation	Baseline characteristics	Allocation concealment	Random housing	Performance blinding	Random outcome assessment	Detection Blinding	Incomplete outcome data	Selective outcome reporting	Other bias sources
Yes	Yes	Unclear	Unclear	Unclear	Unclear	Unclear	Yes	Yes	Unclear
Unclear	Yes	Unclear	Unclear	Unclear	Unclear	Unclear	Yes	Yes	Unclear
Unclear	Yes	Unclear	Unclear	Unclear	Unclear	Unclear	Yes	Yes	Unclear
Yes	Yes	Unclear	Unclear	Unclear	Unclear	Unclear	Yes	Yes	Unclear
Unclear	Yes	Unclear	Unclear	Unclear	Unclear	Unclear	Yes	Yes	Unclear
Yes	Yes	Unclear	Unclear	Unclear	Unclear	Unclear	Yes	Yes	Unclear
Unclear	Yes	Unclear	Unclear	Unclear	Unclear	Unclear	Yes	Yes	Unclear
Yes	Yes	Unclear	Unclear	Unclear	Unclear	Unclear	Yes	Yes	Unclear
Yes	Yes	Unclear	Unclear	Unclear	Unclear	Unclear	Yes	Yes	Unclear
Unclear	Yes	Unclear	Unclear	Unclear	Unclear	Unclear	Yes	Yes	Unclear
Unclear	Yes	Unclear	Unclear	Unclear	Unclear	Unclear	Yes	Yes	Unclear
Unclear	Yes	Unclear	Unclear	Unclear	Unclear	Unclear	Yes	Yes	Unclear
Yes	Yes	Unclear	Unclear	Unclear	Unclear	Unclear	Yes	Yes	Unclear
Yes	Yes	Unclear	Unclear	Unclear	Unclear	Unclear	Yes	Yes	Unclear
Yes	Yes	Unclear	Unclear	Unclear	Unclear	Unclear	Yes	Yes	Unclear
Yes	Yes	Unclear	Unclear	Unclear	Unclear	Unclear	Yes	Yes	Unclear
Unclear	Yes	Unclear	Unclear	Unclear	Unclear	Unclear	Yes	Yes	Unclear
Unclear	Yes	Unclear	Unclear	Unclear	Unclear	Unclear	Yes	Yes	Unclear
Unclear	Yes	Unclear	Unclear	Unclear	Unclear	Unclear	Yes	Yes	Unclear
Yes	Yes	Unclear	Unclear	Unclear	Unclear	Unclear	Yes	Yes	Unclear
Unclear	Yes	Unclear	Unclear	Unclear	Unclear	Unclear	Yes	Yes	Unclear
Yes	Yes	Unclear	Unclear	Unclear	Unclear	Unclear	Yes	Yes	Unclear
Yes	Yes	Unclear	Unclear	Unclear	Unclear	Unclear	Yes	Yes	Unclear
Yes	Yes	Unclear	Unclear	Unclear	Unclear	Unclear	Yes	Yes	Unclear
Yes	Yes	Unclear	Unclear	Unclear	Unclear	Unclear	Yes	Yes	Unclear
Yes	Yes	Unclear	Unclear	Unclear	Unclear	Unclear	Yes	Yes	Unclear
Yes	Yes	Unclear	Unclear	Unclear	Unclear	Unclear	Yes	Yes	Unclear
Yes	Yes	Unclear	Unclear	Unclear	Unclear	Unclear	Yes	Yes	Unclear
Unclear	Yes	Unclear	Unclear	Unclear	Unclear	Unclear	Yes	Yes	Unclear
Unclear	Yes	Unclear	Unclear	Unclear	Unclear	Unclear	Yes	Yes	Unclear
Yes	Yes	Unclear	Unclear	Unclear	Unclear	Unclear	Yes	Yes	Unclear
Unclear	Yes	Unclear	Unclear	Unclear	Unclear	Unclear	Yes	Yes	Unclear
Yes	Yes	Unclear	Unclear	Unclear	Unclear	Unclear	Yes	Yes	Unclear
Unclear	Yes	Unclear	Unclear	Unclear	Unclear	Unclear	Yes	Yes	Unclear
Yes	Yes	Unclear	Unclear	Unclear	Unclear	Unclear	Yes	Yes	Unclear
Yes	Yes	Unclear	Unclear	Unclear	Unclear	Unclear	Yes	Yes	Unclear
Unclear	Yes	Unclear	Unclear	Unclear	Unclear	Unclear	Yes	Yes	Unclear
Yes	Yes	Unclear	Unclear	Unclear	Unclear	Unclear	Yes	Yes	Unclear
Yes	Yes	Unclear	Unclear	Unclear	Unclear	Unclear	Yes	Yes	Unclear
Yes	Yes	Unclear	Unclear	Unclear	Unclear	Unclear	Yes	Yes	Unclear
Yes	Yes	Unclear	Unclear	Unclear	Unclear	Unclear	Yes	Yes	Unclear
Yes	Yes	Unclear	Unclear	Unclear	Unclear	Unclear	Yes	Yes	Unclear
Unclear	Yes	Unclear	Unclear	Unclear	Unclear	Unclear	Yes	Yes	Unclear
Unclear	Yes	Unclear	Unclear	Unclear	Unclear	Unclear	Yes	Yes	Unclear
Yes	Yes	Unclear	Unclear	Unclear	Unclear	Unclear	Yes	Yes	Unclear
Unclear	Yes	Unclear	Unclear	Unclear	Unclear	Unclear	Yes	Yes	Unclear
Yes	Yes	Unclear	Unclear	Unclear	Unclear	Unclear	Yes	Yes	Unclear
Unclear	Yes	Unclear	Unclear	Unclear	Unclear	Unclear	Yes	Yes	Unclear
Yes	Yes	Unclear	Unclear	Unclear	Unclear	Unclear	Yes	Yes	Unclear
Yes	Yes	Unclear	Unclear	Unclear	Unclear	Unclear	Yes	Yes	Unclear
Unclear	Yes	Unclear	Unclear	Unclear	Unclear	Unclear	Yes	Yes	Unclear
