# Supplementary material for: Safety and efficacy of toll-like receptor agonists as therapeutic agents and vaccine adjuvants for infectious diseases in animals: a systematic review
Source: Front Vet Sci. 2024 Sep 17;11:1428713. doi: 10.3389/fvets.2024.1428713 (PMC11442433; doi:10.3389/fvets.2024.1428713)
Supplement: Supplementary file 2 [file Table_2.xlsx]

## Sheet: Sheet1
No.	Title	Year	Age of the study	Authors	Location+I32D1:T8	Type of infectious agent	Infectious Disease	Antigen Type	Antigen	Synergy	TLR agonist	TLR target 1	TLR target 2	TLR target 3	TLR target 4	Synergy Evaluation	Synergistic effect	Comparator groups	Route of TLR agonist administration	Type of intervention	Species	Study design	Sample size per group	Number of groups	Adverse effect assessed	Adverse effects	Type of trial assessment	Increased Potency of vaccine of therapeutic agent	Humoral response	Cellular response	% Efficacy	Specific outcomes	Summary of specific outcomes
1	Therapeutic efficacy of combined active and passive immunization in ART-suppressed, SHIV-infected rhesus macaques	Yr2022	1	Walker-Sperling	USA	Viral	SHIV	Recombinant	PGT121 and Ad26/ MVA	No	Vesatolimod	TLR 7	N/A	N/A	N/A	No	N/A	Unvaccinated	Oral	Therapeutic	Rhesus macaques	CT	51	4	No	N/A	Efficacy	Yes	Yes	Yes	0.7	Virologic control	Therapeutic Ad26/MVA vaccination and PGT121 administration together with TLR7 stimulation with vesatolimod resulted in 70% post-ART virologic control in SHIV-SF162P3-infected rhesus macaques
2	Comparison of the mucosal adjuvanticities of two Toll-like receptor ligands for recombinant adenovirus-delivered African swine fever virus fusion antigens	Yr2021	2	Lu H	China	Viral	ASFV	Recombinant	rAd-F1	No	Flagellin	TLR 5	N/A	N/A	N/A	No	N/A	Unvaccinated	Intranasal	Adjuvant	Swine	CT	9	3	No	N/A	Adjuvancity	Yes	Yes	Yes	N/A	Potent adjuvancity	mHsp70 more potent mucosal adjuvanticity in pigs than FlaB-flagellin, and the fusion rAd vector can be used for ASFV mucosal vaccine development.
3	GS-9620, an oral agonist of Toll-like receptor-7, induces prolonged suppression of hepatitis B virus in chronically infected chimpanzees	Yr2013	10	Lanford RE	USA	Viral	Hepatitis B Virus	Viral infection	N/A	No	GS-9620	TLR 7	N/A	N/A	N/A	No	N/A	N/A	Oral	Therapeutic	Chimpanzees	CT	10	3	No	N/A	Efficacy	No	Yes	Yes	N/A	Rapid reduction of viremia	TLR-7 agonism can induce immune-mediated clearance of infected cells and is a potential therapeutic approach for control or elimination of HBV infection with therapy of finite duration.
4	Systems Immunology Characterization of Novel Vaccine Formulations for Mycoplasma hyopneumoniae Bacterins	Yr2019	4	Matthijs AMF	Belgium	Bacterial	Enzootic Pneumonia	Inactivated	Bacterin	Yes	Pam3Cys-SK4, CpG ODN SL03, Resiquimod	TLR 1/2	TLR 9	TLR 7/8	N/A	Yes	Yes	Unvaccinated	Intramuscular	Adjuvant	Swine	RCT	42	7	Yes	Fever, chronic inflammation, prolonged mild to moderate ISR (IM) , granuloma, severe ISR (ID)	Safety and Immunogenicity	Yes	Yes	Yes	N/A	Immunogenic	Induced M. hyopneumoniae-specific antibody and T-cell responses
5	The effects of administration of ligands for Toll-like receptor 4 and 21 against Marek's disease in chickens	Yr2014	9	Parvizi P	Canada	Viral	MDV	Viral infection	N/A	Yes	LPS, CPG-ODN, poly (I:C)	TLR 4	TLR 21	TLR 3	N/A	No	N/A	PBS	Intra-air sac	Therapeutic	Chicken	CT	210	4	No	N/A	Immunogenicity	No	No	No	N/A	Delay disease progression	TLR4 and 21 agonists modulate anti-virus innate immunity including cytokine responses in MD-infected chicken and this response can only delay, but not inhibit, disease progression
6	TLR9 adjuvants enhance immunogenicity and protective efficacy of the SE36/AHG malaria vaccine in nonhuman primate models	Yr2013	10	Tougan T	Japan	Protozoal	Malaria	Recombinant	SE36 antigen	No	CpG-ODN	TLR 9	N/A	N/A	N/A	No	N/A	Antigen only	Subcutaneous	Adjuvant	Cynomolgus monkeys	RCT	12	4	No	N/A	Immunogenicity	Yes	Yes	Yes	N/A	Suppressed parasitemia and symptoms of malaria	A combination of TLR9 ligand adjuvant with SE 36/AHG induced higher humoral and cellular immune response compared with SE 36/AHG alone
7	Probiotic Lactobacilli Enhance Immunogenicity of an Inactivated H9N2 Influenza Virus Vaccine in Chickens	Yr2020	3	Alqazlan N	Canada	Viral	AIV	Inactivated	H9N2 whole inactivated virus (WIV)	No	CpG-ODN	TLR 21	N/A	N/A	N/A	No	N/A	PBS	Oral	Adjuvant	Chicken	CT	84	6	No	N/A	Immunogenicity	Yes	Yes	Yes	N/A	Enhanced immune response	The group that received probiotics and was vaccinated with CpG-adjuvanted WIV H9N2 vaccine had higher hemagglutination inhibition titers than the other treatment groups at days 14 and 21 postprimary vaccination
8	Comparison of 3 kinds of Toll-like receptor ligands for inactivated avian H5N1 influenza virus intranasal immunization in chicken	Yr2013	10	Liang J	China	Viral	AIV	Inactivated	Inactivated avian influenza virus H5N1	Yes	CpG-ODN, poly (I:C), Bacillus subtilis spores	TLR 21	TLR 3	TLR 2/4	N/A	No	N/A	PBS	Intranasal	Adjuvant	Chicken	RCT	320	8	No	N/A	Immunogenicity	Yes	Yes	Yes	N/A	improved survival rate upon challenge	B. subtilis spores, polyinosinic-polycytidylic acid, or CpG-ODN all could effectively enhance the local and systemic immune responses to IAIV in chickens.
9	Immune responses induced by inactivated porcine reproductive and respiratory syndrome virus (PRRSV) vaccine in neonatal pigs using different adjuvants	Yr2021	2	Vreman S	Netherlands	Viral	PRRSV	Inactivated	inactivated PRRSV	Yes	Pam3Cys, Resiquimod, CpG ODN	TLR 1/2	TLR 7/8	TLR 9	N/A	Yes	No	PBS	Intradermal, Intramuscular	Adjuvant	Swine	RCT	54	6	No	N/A	Efficacy and Immunogenicity	No	No	No	N/A	Specific immune response was not observed in the vaccines containing TLR9 agonis mixture	None of the vaccines showed any efficacy
10	PD-1 Blockade and TLR7 Activation Lack Therapeutic Benefit in Chronic Simian Immunodeficiency Virus-Infected Macaques on Antiretroviral Therapy	Yr2019	4	Bekerman E	USA	Viral	SIV	Viral infection	SIVmac251	No	Vesatolimod,	TLR 7	N/A	N/A	N/A	No	N/A	Vehicle only	Subcutaneous	Therapeutic	Rhesus macaques	CT	20	4	No	N/A	Efficacy	No	No	No	N/A	Not effective	Neither individual treatment nor the combination resulted in changes to viral rebound kinetics following ART interruption or reduction in the SIV reservoir size.
11	Inclusion of Flagellin during Vaccination against Influenza Enhances Recall Responses in Nonhuman Primate Neonates	Yr2015	8	Kim JR	USA	Viral	Influenza Virus	Inactivated	inactivated PR8 influenza virus (IPR8)	No	Flagellin	TLR 5	N/A	N/A	N/A	No	N/A	PBS	Intranasal, Intratracheal	Adjuvant	African green monkey	CT	14	3	No	N/A	Immunogenicity	Yes	Yes	Yes	N/A	Reduced disease following virus infection	flagellin mediated enhancement of vaccine responses in nonhuman primate neonates.
12	Systemic immune responses to an inactivated, whole H9N2 avian influenza virus vaccine using class B CpG oligonucleotides in chickens	Yr2015	8	Singh SM	Canada	Viral	AIV	Inactivated	inactivated H9N2 AIV	No	CpG-ODN	TLR 21	N/A	N/A	N/A	No	N/A	Adjuvant only	Intramuscular	Adjuvant	Chicken	CT	90	7	No	N/A	Immunogenicity	Yes	Yes	N/A	N/A	Effective neutralizing responses	Vaccine formulation containing low dose CpG (2ug) was significantly more effective at generating neutralizing responses than formulations with high dose og CpG and the neutralizing responses significantly exceeded those generated by a squalene-based adjuvanted vaccine
13	Delivery of an inactivated avian influenza virus vaccine adjuvanted with poly(D,L-lactic-co-glycolic acid) encapsulated CpG ODN induces protective immune responses in chickens	Yr2016	7	Singh SM	Canada	Viral	AIV	Inactivated	nonencapsulated H9N2 AIV	No	CpG-ODN	TLR 21	N/A	N/A	N/A	No	N/A	Antigen only	Intramuscular	Adjuvant	Chicken	RCT	40	6	No	N/A	Immunogenicity	Yes	Yes	N/A	N/A	Reduction in virus shedding	Chickens vaccinated with the nonencapsulated AIV vaccine plus PLGA encapsulated CpG 2007 developed significantly higher systemic IgY and local (mucosal) IgY antibodies as well as haemagglutination inhibition antibody titres compared to PLGA encapsulated AIV plus encapsulated CpG 2007 vaccinated chickens
14	Therapeutic efficacy of an Ad26/MVA vaccine with SIV gp140 protein and vesatolimod in ART-suppressed rhesus macaques	Yr2022	1	Ventura, J.D.	USA	Viral	SIV	Recombinant	Ad26/MVA	No	Vesatolimod	TLR 7	N/A	N/A	N/A	No	N/A	Placebo	Oral	Therapeutic	Rhesus macaques	RCT	36	12	No	N/A	Efficacy	Yes	Yes	Yes	N/A	Virologic control	Ad26/MVA therapeutic vaccination with or without an SIV Env boost with vesatolimod administration led to robust SIV-specific cellular immune responses and post-rebound virologic control following ART discontinuation.
15	A synthetic toll-like receptor 7 agonist inhibits porcine reproductive and respiratory syndrome virus replication in piglets	Yr2022	1	Huang, Q.	China	Viral	PRRSV	Viral infection	PRRSV-HuN4	No	SZU10	TLR 7	N/A	N/A	N/A	No	N/A	Placebo	Intramuscular	Therapeutic	Swine	RCT	12	3	No	N/A	Efficacy	Yes	No	Yes	N/A	Reduced Viral load in serum	SZU101 treatment alleviated PRRSV-induced rectal temperature spikes, pulmonary pathologic changes, serum vira, load and increased proliferation of PRRSV-specific lymphocytes and serum IFN-β levels, but did not enhance PRRSV-specific antibody production.
16	The Immunomodulatory Functions of Various CpG Oligodeoxynucleotideson CEF Cells and H9N2 Subtype Avian Influenza Virus Vaccination	Yr2022	1	Li, C.	China	Viral	AIV	Inactivated	H9N2 inactivated virus (WIV)	No	CpG-ODN	TLR 21	N/A	N/A	N/A	No	N/A	PBS	Subcutaneous	Adjuvant	Chicken	RCT	100	10	No	N/A	Immunogenicity	Yes	Yes	Yes	N/A	Induction strong humoral and immune response	CpG ODN 4 and 5 induced the strongly humoral and cellular immune responses during vaccination, in which white oil, as an adjuvant, could significantly improve the immune effect of CpG ODN
17	A yeast expressed RBD-based SARS-CoV-2 vaccine formulated with 3M-052-alum adjuvant promotes protective efficacy in non-human primates	Yr2021	2	Pino, M.	USA	Viral	SARS-CoV-2	Recombinant	RBD-WT	No	3M-052-alum	TLR 7/8	N/A	N/A	N/A	No	N/A	Adjuvant only	Intramuscular	Adjuvant	Rhesus macaques	CT	15	5	No	N/A	Efficacy	Yes	Yes	Yes	N/A	Provides robust immune responses and protection against SARS-CoV-2	RBD+ 3M-052-alum–adjuvanted vaccine promoted better RBD binding and effector antibodies, higher CoV-2 neutralizing antibodies, improved TH1-biased CD4+ T cell reactions, and increased CD8+ T cell responses when compared with the alum-alone adjuvanted vaccine
18	SARS-CoV-2 vaccines elicit durable immune responses in infant rhesus macaques	Yr2021	2	Garrido, C.	USA	Viral	SARS-CoV-2	mRNA	S protein	No	3M-052-SE	TLR 7/8	N/A	N/A	N/A	No	N/A	Antigen only	Intramuscular	Adjuvant	Rhesus macaques	CT	16	2	Yes	No adverse effects	Safety and Efficacy	Yes	Yes	Yes	N/A	Strong and durable immune responses with adverse effects	Infant RMs mount strong and durable responses to mRNA-LNP and protein-based SARS-CoV-2 vaccines that were comparable to adults without adverse reactions.
19	Therapeutic vaccination with Ad48/MVA and TLR7 stimulation in SIVinfected, ART-treated infant rhesus macaques	Yr2020	3	Bricker, K.M.	USA	Viral	SIV	Viral infection	SIVsmE543	No	GS-986	TLR 7	N/A	N/A	N/A	No	N/A	Drug only	Intramuscular	Therapeutic	Rhesus macaques	CT	16	2	No	N/A	Immunogenicity	Yes	Yes	Yes	N/A	Robust immunological response	Ad-prime, MVA-boost therapeutic immunization and repeated oral TLR-7 stimulation is safe and immunogenic in SIV-infected, ARTtreated infant RMs
20	Induction of robust immune responses by cpg-odn-loaded hollow polymeric nanoparticles for antiviral and vaccine applications in chickens	Yr2020	3	Lin, S.	Taiwan	Viral	AIV	Recombinant	rRBD	No	CpG-NP	TLR 21	N/A	N/A	N/A	No	N/A	PBS	Subcutaneous	Adjuvant	Chicken	RCT	18	3	No	N/A	Immunogenicity	Yes	Yes	Yes	N/A	Effective, long-lasting and protective immunological response	PLGA hollow nanoparticle loaded with CpG ODN 2007 adjuvant showed evidence of improved innate immune stimulating effectiveness and long-lasting immunostimulatory ability ex vivo and in vivo in chickens, as compared to free CpG
21	Local Immune Responses After Skin Vaccination in Neonatal and Adult Pigs With Different Toll-Like-Receptor Agonists as Adjuvant	Yr2020	3	Vreman, S.	Ireland	Viral	PRRSV	Inactivated	iPRRSV	Yes	Pam3Cys, R848, CpG ODN	TLR 1/2	TLR 7/8	TLR 9	N/A	No	N/A	Unvaccinated	Intradermal	Adjuvant	Swine	CT	16	4	No	N/A	Immunogenicity	Yes	No	No	N/A	Significant local immune response	TLR7/8 agonist induces a significant local immune response after skin application
22	Efficacy of three innovative bacterin vaccines against experimental infection with Mycoplasma hyopneumoniae	Yr2019	4	Matthijs, A.M.F.	Belgium	Bacterial	Enzootic Pneumonia	Inactivated	M. hyopneumoniae F7.2C	Yes	Pam3Cys-SK4 , CPG-ODN, Resiquimod	TLR 1/2	TLR 7/8	TLR 9	N/A	Yes	Yes	PBS	Intramuscular	Adjuvant	Swine	RCT	53	4	No	N/A	Efficacy	Yes	Yes	Yes	N/A	Reduce clinical symptoms, lung lesions and the M. hyopneumoniae DNA load in the lung	Reduce clinical symptoms, lung lesions and the M. hyopneumoniae DNA load in the lung
23	Evaluation of CpG-ODN-adjuvanted polyanhydride-based intranasal influenza nanovaccine in pigs	Yr2019	4	Dhakal, S.	USA	Viral	Influenza Virus	Inactivated	H1N2-OH10	No	CpG-ODN	TLR 9	N/A	N/A	N/A	No	N/A	Placebo	Intranasal	Adjuvant	Swine	RCT	13	3	No	N/A	Efficacy and Immunogenicity	Yes	Yes	Yes	N/A	Protection from fever and lower infectious virus titres in nasal passage	CpG-ODN in KAg-nanovaccine improved the cross-reactive mucosal antibody response in pigs
24	Incorporation of membrane-anchored flagellin into Salmonella Gallinarum bacterial ghosts induces early immune responses and protection against fowl typhoid in young layer chickens	Yr2018	5	Hajam, I.A.	South Korea	Bacterial	Fowl typhoid	Live attenuated	Salmonella Gallinarum BGs	No	Flagellin	TLR 5	N/A	N/A	N/A	No	N/A	PBS	Oral	Adjuvant	Chicken	RCT	30	3	No	N/A	Immunogenicity	Yes	Yes	Yes	N/A	Protection against virulent challenge	improved antigen-specific humoral and cell mediated immune responses, and enhanced protective efficacy of the BG-based vaccines against the virulent challenges.
25	Oral administration of PLGA-encapsulated CpG ODN and Campylobacter jejuni lysate reduces cecal colonization by Campylobacter jejuni in chickens	Yr2018	5	Taha-Abdelaziz, K.	Canada	Bacterial	Campylobacteriosis	Inactivated	Campylobacter jejuni strain 81–176	No	CpG-ODN	TLR 21	N/A	N/A	N/A	No	N/A	PBS	Intramuscular, Oral	Adjuvant	Chicken	RCT	150	5	No	N/A	Immunogenicity	Yes	Yes	Yes	N/A	Reduced Campylobacter jejuni colonization	Oral administration of CpG resulted in a significant reduction in cecal C. jejuni colonization, whereas E-CpG significantly reduced cecal C. jejuni colonization
26	Evaluation of hydrophobic chitosan-based particulate formulations of porcine reproductive and respiratory syndrome virus vaccine candidate T cell antigens	Yr2017	6	Mokhtar, H.	Canada	Viral	PRRSV	Subunit	PRRSV-1 M/NSP5 peptide	Yes	Adilipoline	TLR 2	TLR 7	N/A	N/A	Yes	Yes	Vehicle only	Subcutaneous	Adjuvant	Swine	RCT	18	3	No	N/A	Immunogenicity	Yes	Yes	Yes	N/A	Significant specific antibody and T cell response	Vaccination with the particulate formulations induced antigen-specific antibody responses, which were most pronounced following booster immunisation.
27	The efficacy of alcelaphine herpesvirus-1 (AlHV-1) immunization with the adjuvants Emulsigen® and the monomeric TLR5 ligand FliC in zebu cattle against AlHV-1 malignant catarrhal fever induced by experimental virus challenge	Yr2016	7	Lankester, F.	Tanzania	Viral	MCF	Attenuated	Attenuated AlHV-1	No	Flagellin	TLR 5	N/A	N/A	N/A	No	N/A	Antigen only	Intramuscular	Adjuvant	Cattle	RCT	40	5	No	N/A	Efficacy	Yes	Yes	No	N/A	Flagellin did not enhance antibody response	Emulsigen induced high titre antibody responses, but Flagellin did not enhance this response
28	An Inactivated Rabies Virus-Based Ebola Vaccine, FILORAB1, Adjuvanted with Glucopyranosyl Lipid A in Stable Emulsion Confers Complete Protection in Nonhuman Primate Challenge Models	Yr2016	7	Johnson, R.F.	Canada	Viral	Ebola virus	Recombinant, bivalent, inactivated	FILORAB1	No	GLA-SE	TLR 4	N/A	N/A	N/A	No	N/A	Antigen only	Intramuscular	Adjuvant	Rhesus macaques and cynomolgus monkeys	RCT	20	4	No	N/A	Efficacy and Immunogenicity	Yes	Yes	No	1	Inreased efficacy of vaccine to 100%	highest antibody titers observed for the FILORAB1 plus GLA-SE group
29	A novel R848-conjugated inactivated influenza virus vaccine is efficacious and safe in a neonate nonhuman primate model	Yr2016	7	Holbrook, B.C.	Canada	Viral	Influenza Virus	Inactivated	Inactivated PR8	Yes	R848, Flagellin	TLR 7/8	TLR 5	N/A	N/A	Yes	No	PBS	Intramuscular	Adjuvant	African green monkey	CT	21	4	Yes	No adverse effects	Safety and Efficacy	Yes	Yes	Yes	N/A	Robust cellular and humoral responses	R848 conjugated inactivated influenza virus particles inducesd robust antibody and cell mediated immune responses in neonates
30	Targeting HIV-1 env gp140 to LOX-1 elicits immune responses in rhesus macaques	Yr2016	7	Zurawski, G.	USA	Viral	HIV	Subunit	Env gp140	Yes	poly ICLC, GLA	TLR 3	TLR 4	N/A	N/A	No	N/A	Placebo	Subcutaneous	Adjuvant	Rhesus macaques	CT	20	4	No	N/A	Immunogenicity	Yes	Yes	Yes	N/A	Robust cellular and humoral responses	Co-administration with Poly ICLC, a TLR3 agonist, was superior to GLA, a TLR4 agonist
31	Reduction of avian influenza virus shedding by administration of Toll-like receptor ligands to chickens	Yr2015	8	Barjesteh, N.	Canada	Viral	AIV	Viral infection	H4N6 AIV	Yes	Pam3CSK4, LPS, R848, CpG	TLR 2	TLR 4	TLR 7	TLR 21	No	N/A	PBS	Intramascular, Intranasal	Therapeutic	Chicken	RCT	360	36	No	N/A	Efficacy	Yes	Yes	Yes	N/A	Reduced oral and cloacal virus shedding	CpG-ODN 1826 was the most efficacious to reduce oral virus shedding, whereas LPS resulted in the largest reduction in cloacal virus shedding
32	Cross-species protection: Schistosoma mansoni Sm-p80 vaccine confers protection against Schistosoma haematobium in hamsters and baboons	Yr2014	9	Karmakar, S.	USA	Protozoal	Schistosomiasis	Recombinant	Sm-p80	No	GLA-SE	TLR 4	N/A	N/A	N/A	No	N/A	Adjuvant only	N/A	Adjuvant	Baboons	CT	4	2	No	N/A	Efficacy	Yes	Yes	Yes	N/A	Reduction in S. haematobium adult worms and decreased the egg load in the urinary bladder	Sm-p80 / GLA-SE vaccine produced a 25% reduction in S. haematobium adult worms and decreased the egg load in the urinary bladder by 64%
33	An Eimeria vaccine candidate based on Eimeria tenella immune mapped protein 1 and the TLR-5 agonist Salmonella typhimurium FliC flagellin	Yr2013	10	Yin, G.	China	Protozoal	Eimeria tenella	Subunit	E. tenella IMP1 (EtIMP1)	No	Flagellin	TLR 5	N/A	N/A	N/A	No	N/A	PBS	Intramuscular	Adjuvant	Chicken	RCT	N/A	6	No	N/A	Immunogenicity	Yes	Yes	Yes	N/A	Strong cellular immune responses	EtIMP1-flagellin fusion protein can be used as an effective immunogen in the development of subunit vaccines against Eimeria infection
34	Polyinosinic-polycytidylic acid is the most effective TLR adjuvant for SIV gag protein-induced t cell responses in nonhuman primates	Yr2013	10	Park, H.	USA	Viral	SIV	Subunit	SIV Gag protein	No	poly IC	TLR 3	N/A	N/A	N/A	Yes	No	Antigen only	Subcutaneous	Adjuvant	Rhesus macaques	CT	42	7	No	N/A	Immunogenicity	Yes	N/A	Yes	N/A	Significantly higher cellular immune response than the other adjuvants	Prime-boost vaccination with SIV Gag protein/Poly IC improves magnitude, breadth, and durability of CD4+ T cell immune responses
35	A toll-like receptor 3 ligand enhances protective effects of vaccination against Marek's disease virus and hinders tumor development in chickens	Yr2012	11	Parvizi, P.	Canada	Bacterial	MDV	Live attenuated	Herpesvirus of Turkeys (HVT)	No	poly IC	TLR 3	N/A	N/A	N/A	No	N/A	Placebo	Intramuscular	Adjuvant	Chicken	RCT	72	6	No	N/A	Efficacy	Yes	N/A	Yes	N/A	Enhanced efficacy and protection against MDV	poly(I:C) treatment administered prior to and after HVT vaccination, enhanced the efficacy of HVT vaccine and improved protection against MDV
36	Protection against bovine tuberculosis induced by oral vaccination of cattle with Mycobacterium bovis BCG is not enhanced by co-administration of mycobacterial protein vaccines	Yr2011	12	Wedlock, D.N.	New Zealand	Protozoal	Bovine tuberculosis	Live attenuated	M. bovis culture filtrate proteins (CFP)	No	Pam3CSK4	TLR 2	N/A	N/A	N/A	Yes	No	Unvaccinated	Subcutaneous	Adjuvant	Cattle	RCT	80	8	No	N/A	Efficacy	Yes	N/A	Yes	N/A	No enhnaced protection	No evidence of protection in calves vaccinated with the combination of oral BCG and CFP/Emulsigen/Pam3CSK4 or oral BCG and CFP/Chitin/Gel 01 or vaccinated with the protein vaccines alone
37	Preclinical prophylactic efficacy testing of Sm-p80-based vaccine in a nonhuman primate model of schistosoma mansoni infection and immunoglobulin G and e responses to Sm-p80 in human serum samples from an area where schistosomiasis is endemic	Yr2011	12	Ahmad, G.	USA	Worms	Schistosomiasis	Subunit	Schistosome antigen (Sm-p80)	Yes	R848, CpG-ODN	TLR 7/8	TLR 9	N/A	N/A	No	N/A	Adjuvant only	Intramuscular	Adjuvant	Baboons	CT	28	8	No	N/A	Efficacy	Yes	Yes	Yes	N/A	Increased prophylactic efficacy	Recombinant Sm-p80 formulated in TLR7 and TLR9 agonists provides the best levels of prophylactic efficacy in baboons (52%–58%)
38	Evaluation of the safety and immunogenicity in rhesus monkeys of a recombinant malaria vaccine for Plasmodium vivax with a synthetic toll-like receptor 4 agonist formulated in an emulsion	Yr2011	12	Lumsden, J.M.	USA	Protozoal	Malaria	Recombinant	Synthetic recombinant protein VMP001	No	GLA-SE	TLR 4	N/A	N/A	N/A	No	N/A	Antigen only	Intramuscular	Adjuvant	Rhesus macaques	RCT	20	3	Yes	No adverse effects	Safety and Immunogenicity	Yes	Yes	Yes	N/A	Strong cellular and humoral immune response	Malaria vaccine VMP001/GLA-SE is safe, with no significant local or systemic adverse reactions, capable of eliciting antibody and CD4+ T cell responses in the rhesus monkey model
39	Decreased dengue replication and an increased anti-viral humoral response with the use of combined toll-like receptor 3 and 7/8 agonists in macaques	Yr2011	12	Sariol, C.A.	USA	Viral	Dengue virus	Viral infection	DENV	Yes	poly IC, CL097M-012	TLR 3	TLR 7/8	N/A	N/A	Yes	Yes	Placebo	Subcutaneous	Therapeutic	Rhesus macaques	RCT	14	4	No	N/A	Immunogenicity	Yes	Yes	Yes	N/A	Increased humoral response and decreased viraemia	Concurrent TLR3/7/8 activation of the innate immune response after DENV infection increased inflammatory and humoral responses in rhesus macaques, resulting in decreased viremia and melioration of the infection
40	Toll-like receptor agonists as adjuvants for inactivated porcine reproductive and respiratory syndrome virus (PRRSV) vaccine	Yr2019	4	Vreman, S	Netherlands	Viral	PRRSV	Inactivated	iPRRSV strain 07V063	Yes	Pam3Cys, R848, CpG ODN	TLR 1/2	TLR 7/8	TLR 9	N/A	No	N/A	Antigen only	Intramuscular	Adjuvant	Swine	RCT	48	8	No	N/A	Immunogenicity	No	No	No	N/A	No enhanced immune response	TLR 1/2, 7/8 or 9 agonist as adjuvant with iPRRSV did not induce detectable PRRSV-specific immune response, independent of the administration route. TLR9a showed reductionof vireamia, indicating efficacy for CpG ODN as an injected adjuvant
41	Intradermal co-inoculation of codon pair deoptimization (CPD)-attenuated chimeric porcine reproductive and respiratory syndrome virus (PRRSV) with Toll like receptor (TLR) agonists enhanced the protective effects in pigs against heterologous challenge	Yr2021	2	Park, C	Korea	Viral	PRRSV	Attenuated	CPD-attenuated chimeric PRRSV ( LMY-BP-CPD)	Yes	HSP70c, HSPX	TLR 2	TLR 4	N/A	N/A	No	N/A	PBS	Intramuscular, Intradermal	Adjuvant	Swine	RCT	30	6	No	N/A	Efficacy	Yes	Yes	Yes	N/A	Excellent protective efficacy	Intradermal inoculation with the TLR agonists enhanced protective effects with significant reduction of pathological lesion and viral load in lung
42	Co-administration of toll-like receptor (TLR)-3 agonist Poly I:C with different infectious bursal disease (IBD) vaccines improves IBD specific immune response in chicken	Yr2021	2	Kannaki, TR	India	Viral	IBD	Live attenuated and inactivated combination	IBD vaccines	No	poly IC	TLR 3	N/A	N/A	N/A	No	N/A	PBS	Intramuscular,Subcutaneous, Oral	Adjuvant	Chicken	RCT	320	8	No	N/A	Immunogenicity	Yes	Yes	N/A	N/A	Improved immune response, protective immunity	poly I:C co-administration with intermediate IBD and bursaplex vaccine improved the specifc immune response with least immunosuppression and bursal damage
43	Avian Influenza Virus Vaccines Containing Toll-Like Receptors 2 and 5 Ligand Adjuvants Promote Protective Immune Responses in Chickens	Yr2014	9	St Paul, M	Canada	Viral	AIV	Inactivated	inactivated H4N6 virus	Yes	Flagellin, Pam3CSK4	TLR 2	TLR 5	N/A	N/A	No	N/A	Antigen only	Subcutaneous	Adjuvant	Chicken	CT	40	4	No	N/A	Immunogenicity	Yes	Yes	Yes	N/A	Enhanced humoral and cellular immune response	TLR2 and TLR5 ligands can serve as efficacious AIV vaccine adjuvants
44	Effects of Ligands for Toll-Like Receptors 3, 4, and 21 as Adjuvants on the Immunogenicity of an Avian Influenza Vaccine in Chickens	Yr2014	9	St Paul, M	Canada	Viral	AIV	Inactivated	inactivated H4N6 virus	Yes	poly IC, LPS, CpG ODN	TLR 3	TLR 4	TLR 21	N/A	Yes	Yes	Antigen only	Subcutaneous	Adjuvant	Chicken	CT	80	8	No	N/A	Immunogenicity	Yes	Yes	Yes	N/A	Enhanced humoral and cellular immune response	poly I:C and CpG combination adjuvant enhances antibody-mediated and cell-mediated immune responses against AIV antigens
45	Control of Heterologous Simian Immunodeficiency Virus SIVsmE660 Infection by DNA and Protein Coimmunization Regimens Combined with Different Toll-Like-Receptor-4-Based Adjuvants in Macaques	Yr2018	5	Singh, S	USA	Viral	SIV	DNA and Subunit combination	SIVmac251	No	GLA-SE, Imiquimod	TLR 4	TLR 7	N/A	N/A	Yes	Yes	Placebo	Intramuscular	Adjuvant	Rhesus macaques	RCT	36	3	No	N/A	Immunogenicity	Yes	Yes	Yes	N/A	Robust humoral ans Cellular immune response with reduced peak viremia	Combination of DNA and gp120 Env protein vaccine regimens using two different adjuvants induced durable and potent cellular and humoral responses contributing to a lower risk of infection by heterologous SIV challenge
46	Inactivated vaccine with adjuvants consisting of pattern recognition receptor agonists confers protection against avian influenza viruses in chickens	Yr2014	9	Tang, YH	China	Viral	AIV	Inactivated	H5, H9	Yes	poly I:C, resiquimod, imiquimod	TLR 3	TLR 7/8	TLR 7	N/A	Yes	Yes	Unvaccinated	Subcutaneous	Adjuvant	Chicken	CT	60	6	No	N/A	Efficacy	Yes	Yes	Yes	N/A	Enhanced humoral and cellular immune response	Adjuvant CVCVA5 enhanced the potency of existing avian influenza vaccines by increasing humoral and cellular immune response
47	Combination of TLR2 and TLR3 agonists derepress infectious bursal disease virus vaccine-induced immunosuppression in the chicken	Yr2019	4	Bashir, K	India	Viral	IBD	Live attenuated and inactivated combination	live intermediate plus IBDV, infectious bronchitis virus (IBV) vaccines	Yes	Pam3CSK4, poly I:C	TLR 2	TLR 3	N/A	N/A	Yes	Yes	Unvaccinated	Intramuscular	Adjuvant	Chicken	RCT	60	6	No	N/A	Immunogenicity	Yes	Yes	Yes	N/A	Reduced destruction of B cells and restoration of the function of T cells	poly I:C alone and its combination with Pam3CSK4 reduced the destruction of B cells as well as bursal damage with restoration of function of T cells and macrophages when used with a hot IBDV vaccine.
48	Adjuvanting a DNA vaccine with a TLR9 ligand plus Flt3 ligand results in enhanced cellular immunity against the simian immunodeficiency virus	Yr2007	16	Kwissa, M	USA	Viral	SIV	DNA and Modified	DNA/MVA	Yes	CpG-ODN, 3M-003	TLR 9	TLR 7/8	N/A	N/A	No	N/A	Antigen only	Intradermal	Adjuvant	Rhesus macaques	CT	25	5	No	N/A	Efficacy and Immunogenicity	Yes	N/A	Yes	N/A	Reduction in peak viremia and cumulative viral loads in TLR9-L plus FL-adjuvanted group relative to the unvaccinated group	TLR9-L (CpG DNA) enhanced the magnitude of antigen-specific CD8
49	Virus-Like Particles Displaying Trimeric Simian Immunodeficiency Virus (SIV) Envelope gp160 Enhance the Breadth of DNA/Modified Vaccinia Virus Ankara SIV Vaccine-Induced Antibody Responses in Rhesus Macaques	Yr2016	7	Iyer, SS a	USA	Viral	SIV	DNA and modified	DNA/MVA, VLP (DMVLP)	Yes	MPLA, R848	TLR 4	TLR 7/8	N/A	N/A	Yes	Yes	Unvaccinated	Subcutaneous	Adjuvant	Rhesus macaques	RCT	14	4	No	N/A	Efficacy and Immunogenicity	Yes	Yes	Yes	N/A	Significant enhancement of systemic antibody titers	Vaccinated animals demonstrated stronger acute viral pulldown than controls. Immunization with VLPs containing trimeric Env augments protective antibody but suboptimal engagement of CD8 T cells to achieve robust early viral control
50	Prospects of developing a prophylactic vaccine against human lymphatic , filariasis - evaluation of protection in non-human primates	Yr2018	5	Khatri, V	USA	Worms	Filariasis	Recombinant	rBmHAT, rBmHAXT	No	AL019	TLR 4	N/A	N/A	N/A	No	N/A	Adjuvant only	N/A	Adjuvant	Rhesus macaques	RCT	40	4	No	N/A	Efficacy and Immunogenicity	Yes	Yes	Yes	0.57	Confered protective immunity	Immunization with rBmHAXT plus AL019 generated functional protective antibodies and memory T cells that conferred 57% protection against challenge infections in macaques
51	Parenteral immunization of Salmonella Typhimurium ghosts with surface-displayed Escherichia coli flagellin enhancesTLR-5 mediated activation of immune responses that protect the chicken against Salmonella infection	Yr2020	3	Senevirathne, A	Korea	Bacterial	Salmonellosis	Subunit	Ghost plasmid JOL912 pJHL184	No	Flagellin	TLR 5	N/A	N/A	N/A	No	N/A	PBS	Intramuscular	Adjuvant	Chicken	CT	60	4	No	N/A	Efficacy and Immunogenicity	Yes	Yes	Yes	N/A	Enhanced protective immune responses	Flagellin antigen as an adjuvant displayed on ST ghosts enhances protective immune responses in immunized chicken
